# Supplementary material for: De ontwikkeling van een training om Gezonde School-adviseurs te stimuleren contextgericht te werken: een proces in cocreatie
Source: Springer Nature journal article supplement (doi:10.1007/s12508-023-00405-x), 2023-06-30
Supplement: MOESM1 [file 25563748]

## **Het landelijke programma Gezonde School en de Gezonde School-adviseur**

### **De Gezonde School**

Het landelijke programma Gezonde School heeft als doel om een gezonde leefstijl in het DNA van elke school te krijgen en een gezonde leefstijl vanzelfsprekend te maken[1]. Het programma wordt gefinancierd door de overheid en gecoördineerd door GGD GHOR Nederland, RIVM, PO-raad, VO-raad en MBO Raad. Het programma kent verschillende thema's[1], zoals voeding, relaties & seksualiteit, welbevinden. Ieder thema krijgt, met behulp van de landelijke thema-instituten, inhoudelijk vorm. Scholen worden gestimuleerd om binnen een thema te focussen op vier pijlers: educatie, schoolomgeving, beleid en signaleren van gezondheids- en/of leefstijlproblemen onder leerlingen en studenten. Een Gezonde School-vignet op een thema kan behaald worden als aangetoond wordt dat aan de opgestelde criteria per pijler is voldaan. Een school mag zich dan voor drie jaar Gezonde School noemen. Er wordt daarnaast gestimuleerd om een Gezonde School-coördinator aan te stellen als aanspreekpunt en kartrekker van de Gezonde School-aanpak op school. Tenslotte kunnen scholen ondersteuningsaanbod krijgen voor de implementatie van de aanpak, bestaande uit een geldbedrag van 3000 euro, scholingsaanbod voor de Gezonde School-coördinator en 10 uur ondersteuning van een GSA[1].

### **De Gezonde School-adviseur van de GGD**

Iedere GGD heeft de autonomie om zijn eigen organisatiestructuur op te zetten om de verantwoordelijkheden van de GSA te financieren en verder te specificeren. Vaak hebben GSA's een bredere gezondheidsbevorderende taak in meerdere gemeenten. De grootte van het team van GSA's kan per GGD verschillen, afhankelijk van de keuzes die de GGD maakt. Daarom kan het variëren hoeveel tijd en flexibiliteit de GSA heeft met de drie hoofdfinancieringsstructuren voor deze functie: het eerder genoemde tien uur advies gefinancierd uit het landelijke programma, gemeentegelden als een gemeente besluit voor extra uren, en/of flexibiliteit in ter beschikking gestelde tijd bekostigd door de GGD zelf.
