# Supplementary material for: De ontwikkeling van een training om Gezonde School-adviseurs te stimuleren contextgericht te werken: een proces in cocreatie
Source: Springer Nature journal article supplement (doi:10.1007/s12508-023-00405-x), 2023-06-30
Supplement: MOESM2 [file 25563748]

## Literatuurstudie naar taken van Gezonde School-adviseurs

De eerste stap die genomen is in het ontwikkelproces van de training is een narratieve literatuurstudie van internationale literatuur. In deze literatuurstudie werd beoogd te verkennen wat er zowel in Nederland als wereldwijd al bekend was over de ondersteunende rol van Gezonde School-adviseurs (GSA's), of vergelijkbare professionals in andere landen, tijdens het implementatieproces van de Gezonde School-aanpak (in Engels: Health Promoting School approach). De uitvoerend onderzoekers hadden uitgebreide kennis van en inzicht in de bestaande literatuur omtrent de implementatie van de HPS-aanpak. Op basis hiervan werd een eerste selectie gemaakt van publicaties. Vervolgens is de snowballing-methode gebruikt om op basis van de referenties in deze publicaties andere relevante publicaties te identificeren. Alle publicaties zijn vervolgens gescreend op het beschrijven van (potentiële) GSA-taken. Wanneer dit het geval was, werd de publicatie geïnccludeerd en de taken geëxtraheerd. Deze taken werden gegroepeerd. Aan de hand van deze groepering werden overkoepelende rollen geïdentificeerd.

55 publicaties werden geïdentificeerd en gescreend. Van deze 55 publicaties, bespraken 14 studies taken van GSA's. Er werden 41 taken geëxtraheerd:

| <b>Taken van een GSA op basis van de literatuurstudie</b><br><b>Een GSA..</b>                                                                                                                   | <b>Geïdentificeerde rol</b>           |
|-------------------------------------------------------------------------------------------------------------------------------------------------------------------------------------------------|---------------------------------------|
| .. is de link tussen de school en externe organisaties en treedt op als het centrale contactpunt[1, 2].                                                                                         | <i>Engels:</i><br>Linking pin         |
| .. benadert en verbindt mogelijke externe partners met de school[1-3].                                                                                                                          |                                       |
| .. zoekt balans tussen top-down expertise en bottom-up betrokkenheid en overtuigt de school en externe partners van dit belang[2].                                                              | <i>Nederlands:</i><br>Spin in het web |
| .. ondersteunt bij het opzetten van co-creatie van alle betrokkenen[3].                                                                                                                         |                                       |
| .. helpt de school om een gedeelde visie te formuleren tussen alle betrokkenen, inclusief externe partners[3, 4].                                                                               |                                       |
| .. verbindt de school met andere scholen om ervaringen uit te wisselen[5].                                                                                                                      |                                       |
| .. maakt de school bekend met de HPS-aanpak[6].                                                                                                                                                 | <i>Engels:</i><br>Expert in the field |
| .. helpt de school met het aanvragen van (aanvullende) financiële middelen[2].                                                                                                                  |                                       |
| .. ondersteunt de school in het uitvoeren van een behoefte-inventarisatie om de focus te bepalen[2, 7, 8].                                                                                      | <i>Nederlands:</i><br>Lokale expert   |
| .. heeft up-to-date kennis over evidence-based interventies en deelt dit met de school wanneer nodig/mogelijk[1, 2, 9].                                                                         |                                       |
| .. adviseert over de adoptie, implementatie en continuering van inhoudelijk relevante interventies, waarbij behoeftes, wensen en mogelijkheden van de school meegenomen worden[3, 4, 6, 7, 10]. |                                       |
| .. adviseert over de meest optimale samenstelling van een werkgroep (docenten, ouders, kinderen, externen)[2].                                                                                  |                                       |
| .. adviseert over ouderbetrokkenheid[2].                                                                                                                                                        |                                       |
| .. deelt ervaringen van best-practices[2].                                                                                                                                                      |                                       |
| .. ondersteunt de school om interventies in te bedden in de bestaande praktijk van de school[8, 9].                                                                                             |                                       |
| .. neemt voldoende tijd om bekend te raken en te blijven met de context en dynamiek in de school[2].                                                                                            | <i>Engels:</i><br>Involved adaptor    |
| .. investeert in het vergaren van vertrouwen van de school[3].                                                                                                                                  |                                       |
| .. voelt aan wat de school nodig heeft, zoals type ondersteuning (bijvoorbeeld actief of met name informatief)[2].                                                                              | <i>Nederlands:</i><br>Navigator       |
| .. herkent momentum in de school en gebruikt dit[3].                                                                                                                                            |                                       |

|                                                                                                                                                                                                                                                                                                                                                                                                                                                                                                                                                                                                                                                                                                                                                                                                                                                                                                                                                                                                                                                                                                                                                                                                                                                                                                                                                                                                                                                                                                                                                                                                                                                                                                                                                                                                                                                                                                                                                         |                                                                                                    |
|---------------------------------------------------------------------------------------------------------------------------------------------------------------------------------------------------------------------------------------------------------------------------------------------------------------------------------------------------------------------------------------------------------------------------------------------------------------------------------------------------------------------------------------------------------------------------------------------------------------------------------------------------------------------------------------------------------------------------------------------------------------------------------------------------------------------------------------------------------------------------------------------------------------------------------------------------------------------------------------------------------------------------------------------------------------------------------------------------------------------------------------------------------------------------------------------------------------------------------------------------------------------------------------------------------------------------------------------------------------------------------------------------------------------------------------------------------------------------------------------------------------------------------------------------------------------------------------------------------------------------------------------------------------------------------------------------------------------------------------------------------------------------------------------------------------------------------------------------------------------------------------------------------------------------------------------------------|----------------------------------------------------------------------------------------------------|
| <p>.. heeft overzicht van de essentiële personen in de school en de diversiteit van stakeholders in een specifieke school[11].</p> <p>.. heeft oog voor de fysieke en organisationele structuren in de school die bijdragen aan succesvolle implementatie[5].</p> <p>.. staat open voor wat er zoal in de school gebeurt en reageert hier flexibel op[2].</p> <p>.. houdt bij wat er in een school gebeurt met betrekking tot gezondheidsbevordering[4, 5].</p> <p>.. heeft oog voor verwachtingen van alle betrokkenen en hun behoeftes en wensen, de beschikbare middelen en de mogelijke haakjes[1, 6, 12].</p>                                                                                                                                                                                                                                                                                                                                                                                                                                                                                                                                                                                                                                                                                                                                                                                                                                                                                                                                                                                                                                                                                                                                                                                                                                                                                                                                      |                                                                                                    |
| <p>.. helpt de school om te begrijpen dat de implementatie van de HPS-aanpak niet over een nacht ijs gaat en dus geduld essentieel is[4, 9].</p> <p>.. helpt de school om te begrijpen dat de implementatie van de HPS-aanpak een continu veranderingsproces is en niet een tijdelijk project dat 'af' is[9].</p> <p>.. draagt zorg voor dat er voldoende tijd besteed wordt aan voorbereiding en het creëren van draagvlak[2, 3].</p> <p>.. creëert bewust constructieve communicatie met en in de school[1, 10].</p> <p>.. adviseert niet alleen op inhoud maar ook op proces en samenwerking[1, 9].</p> <p>.. helpt de school om taken op een goede manier te verdelen en ondersteuning te zoeken wanneer nodig[2].</p> <p>.. helpt de school om om te gaan met barrières en om creatieve oplossingen te vinden[13].</p> <p>.. helpt de school om het belang van feedback loops te begrijpen en deze op te zetten zodat inzicht verkregen kan worden in de wensen en behoeftes van betrokkenen, en op deze inzichten kan inspelen wanneer processen niet optimaal verlopen[2, 14].</p> <p>.. helpt de school om het proces en de impact te monitoren en evalueren, waarin de adviseur bewaakt dat de evaluatie een brede focus heeft, verschil wordt gemaakt tussen korte- en lange termijn doelen, en er geëvalueerd wordt op zowel effect evaluatie (effect sizes) en context evaluatie (hoe, voor wie, waar, onder welke omstandigheden)[1-3].</p> <p>.. monitort dat de focus en inzet niet verdwijnt tijdens het proces[5].</p> <p>.. monitort in welke mate activiteiten daadwerkelijk onderdeel worden van de dagelijkse praktijk van de school door naar het bereik en de intensiteit van activiteiten te kijken en de samenhang tussen activiteiten[4, 11].</p> <p>.. helpt de school om na te denken over borging, zodat zowel activiteiten als de visie kunnen blijven bestaan, zelfs als er personeelwisselingen plaatsvinden[4, 5].</p> | <p><i>Engels:</i><br/>Critical friend</p> <p><i>Nederlands:</i><br/>Kritische vriend</p>           |
| <p>.. helpt de school om het belang van het werken met de HPS-aanpak in te zien[1].</p> <p>.. maakt en houdt de school enthousiast voor werken met de HPS-aanpak[4, 5].</p> <p>.. helpt de school om te begrijpen dat het aanpakken van complexe problematiek (zoals overgewicht) ook om complexe systeem-brede oplossingen vraagt, en dat een 'quick-fix' mentaliteit met ad-hoc interventies niet tot structurele verandering leidt[2, 4].</p> <p>.. helpt een school om ondersteuning te krijgen van overkoepelende schoolorganen door schoolbesturen te betrekken en op hun rol en verantwoordelijkheid aan te spreken[2].</p> <p>.. moedigt potentiële externe partners aan om bij te dragen aan de implementatie van de HPS aanpak[4].</p>                                                                                                                                                                                                                                                                                                                                                                                                                                                                                                                                                                                                                                                                                                                                                                                                                                                                                                                                                                                                                                                                                                                                                                                                        | <p><i>Engels:</i><br/>Ambassador of the HPS approach</p> <p><i>Nederlands:</i><br/>Ambassadeur</p> |

## Gebruikte publicaties

1. Boot, N., *Gezondheidsbevordering en voortgezet onderwijs, verstandshuwelijk of echte liefde?: een onderzoek naar de implementatie van schoolgezondheidsbeleid binnen scholen voor voortgezet onderwijs*. 2011: Maastricht University.
2. Verjans-Janssen, S.R., *Implementation and evaluation of a context-based physical activity and nutrition intervention in the primary school environment*. 2020, Maastricht University: Maastricht.
3. Bartelink, N., *Evaluating health promotion in complex adaptive school systems: The Healthy Primary School of the Future*. 2019, Maastricht University: Maastricht.
4. Deschesnes, M., C. Martin, and A.J. Hill, *Comprehensive approaches to school health promotion: how to achieve broader implementation?* Health Promot Int, 2003. 18(4): p. 387-396.
5. Rowling, L. and O. Samdal, *Filling the black box of implementation for health-promoting schools*. Health Educ 2011. 111(5): p. 347-362.
6. Mclsaac, J.-L.D., et al., *Interventions to support system-level implementation of health promoting schools: a scoping review*. International Journal of Environmental Research and Public Health, 2016. 13(2): p. 200.
7. Leurs, M., *A collaborative approach to tailored whole-school health promotion*. The schoolBeat study. Maastricht/Amersfoort, 2008.
8. Langford, R., et al., *The World Health Organization's Health Promoting Schools framework: a Cochrane systematic review and meta-analysis*. BMC Public Health, 2015. 15(1): p. 130.
9. Pucher, K.K., *Optimizing intersectoral collaboration in school health promotion: creating win-win situations and a systematic implementation based on the diagnosis of sustainable collaboration model*. 2015: Maastricht University.
10. Bos, V., D.M. de Jongh, and T.G.W.M. Paulussen, *Gezondheidsbevordering en preventie in het onderwijs. Stand van zaken, effectiviteit en ervaringen van GGD'en en scholen*. 2010, RIVM: Bilthoven.
11. Hawe, P., A. Shiell, and T. Riley, *Theorising interventions as events in systems*. Am J Commun Psychol, 2009. 43(3-4): p. 267-276.
12. Darlington, E., N. Violon, and D. Jourdan, *Implementation of health promotion programmes in schools: an approach to understand the influence of contextual factors on the process?* BMC Public Health, 2018. 18(1): p. 163.
13. Ter Haar, W., *Communiceren en improviseren: Omgaan met dynamiek en complexiteit bij de ontwikkeling en implementatie van een gezondheidsinterventie*. 2014, Universiteit van Amsterdam Amsterdam.
14. Snyder, S., *The simple, the complicated, and the complex: Educational reform through the lens of complexity theory*. 2013.
