# Supplementary material for: De ontwikkeling van een training om Gezonde School-adviseurs te stimuleren contextgericht te werken: een proces in cocreatie
Source: Springer Nature journal article supplement (doi:10.1007/s12508-023-00405-x), 2023-06-30
Supplement: MOESM3 [file 25563748]

## Interview guide

### Doel

Inzicht in de werkzaamheden van de GSA, hun rol(len) in de geboden ondersteuning en waar behoefte ligt rondom deskundigheidsbevordering.

### Algemene introductie

Door verhalen uit de praktijk en onze eigen ervaringen met onderzoeken die in de praktijk hebben plaatsgevonden, merken we dat contextgericht werken belangrijk is, dus zo veel mogelijk aansluiten bij de specifieke situatie van de school, maar dat GSA's het vaak ook nog lastig vinden. Ons doel is daarom, om in samenwerking met de GSA's uit de praktijk en de het programma Gezonde School, een training te ontwikkelen om GSA's hier in te ondersteunen. Wat precies in die training komt, is nog helemaal open en willen we echt laten afhangen van wat de wensen en behoeften zijn van de GSA's in de praktijk. Dit interview is dan ook bedoeld om te horen van verschillende GSA's hoe hun werkzaamheden eruit zien in de praktijk, wat hun rol(len) is/zijn in de ondersteuning die ze bieden en waar behoefte ligt rondom deskundigheidsbevordering.

[Niet iedere vraag hoeft precies gesteld te worden, het gaat erom dat een goed beeld verkregen wordt van de GSA.]

### Achtergrond GSA

- Wat is je achtergrond? (opleiding, werk hiervoor)
- Wat is je leeftijd? Hoeveel jaar ben je al werkzaam als GSA?
- Met hoeveel GSA's zijn jullie binnen jullie GGD regio?
- Hoeveel uur krijg je voor je werk als GSA?
- Hoeveel scholen begeleidt je? Hoe lang begeleidt je die scholen al?
- Hoe vaak ben je gemiddeld op een school aanwezig?
- Ben je nog werkzaam in een andere functie naast de functie van GSA? Zoals JOGG regisseur.

[Benoem corona, dat werk veranderd is, maar om goed zicht te krijgen op behoeften en wensen rondom een training is de normale situatie, dus pre-corona, het uitgangspunt.]

### Deel 1: De werkzaamheden van de GSA

Het werk van een GSA is zo veel omvattend dat we eerst een beeld willen krijgen van de werkzaamheden van de GSA. We kunnen ons voorstellen dat dit kan verschillen voor de verschillende fases in het begeleidingsproces van een school. Dus laten we maar gewoon bij het begin beginnen.

#### *Fase 1: Je bent nieuw op een school:*

- Hoe ziet je werk er dan in zijn algemeenheid uit? Verschilt dat erg per school?
- Hoe kom je in contact met een nieuwe school?
- Zit er verschil in hoe je een nieuwe school benaderd? Waar komt dat door (contextuele factoren)?
- Wat zijn de belangrijkste taken volgens jou in deze fase?
- Wat moet je volgens jou in deze fase goed kunnen als GSA zijnde?
- Heb je bepaalde handige trucs of tactieken die je altijd wel gebruikt in deze fase?
- In hoeverre stem je je werkzaamheden in deze fase af op de specifieke kenmerken en omstandigheden van de school? Hoe doe je dat dan? Kun je voorbeelden geven?

#### *Fase 2: Je gaat samen met de school aan de slag met het uitvoeren van GB-activiteiten:*

- Hoe ziet je werk er dan in zijn algemeenheid uit? Verschilt dat erg per school?
- Wat zijn de belangrijkste taken volgens jou in deze fase?
- Wat moet je volgens jou in deze fase goed kunnen als GSA zijnde?

- Heb je bepaalde handige trucs of tactieken die je altijd wel gebruikt in deze fase?
- In hoeverre stem je je werkzaamheden in deze fase af op de specifieke kenmerken en omstandigheden van de school? Hoe doe je dat dan? Kun je voorbeelden geven?

*Fase 3. Je begeleidt de school al vele jaren en werkzaamheden zijn vooral gericht op verduurzaming of uitbreiding van GB-activiteiten:*

- Hoe ziet je werk er dan in zijn algemeenheid uit? Verschilt dat erg per school?
- Wat zijn de belangrijkste taken volgens jou in deze fase?
- Wat moet je volgens jou in deze fase goed kunnen als GSA zijnde?
- Heb je bepaalde handige trucs of tactieken die je altijd wel gebruikt in deze fase?
- In hoeverre stem je je werkzaamheden in deze fase af op de specifieke kenmerken en omstandigheden van de school? Hoe doe je dat dan? Kun je voorbeelden geven?

## **Deel 2: De verschillende rollen van de GSA**

Uit de wetenschappelijke literatuur (en in afstemming met mensen uit de praktijk) halen we vijf rollen van de GSA.

### **1. De spin in het web (Engels: linking pin)**

De GSA verbindt de school met externe partners en helpt om betrokkenheid binnen de school te stimuleren. De GSA helpt om alle partijen in co-creatie te laten samenwerken, waarin een balans wordt gevonden tussen expertise van buitenaf en betrokkenheid van de mensen in de school.

### **2. De lokale expert op het gebied van gezondheidsbevordering (Engels: expert in the field)**

De GSA beschikt over expertise en up-to-date kennis wat betreft de specifieke thema's van Gezonde School en de integrale Gezonde School-aanpak in het algemeen. De GSA zet deze kennis, samen met de eigen ervaringen, in om de school te begeleiden in hun proces om Gezonde School te worden en te blijven.

### **3. De betrokken en flexibele ondersteuner (Engels: involved adapter)**

De GSA is betrokken, heeft oog voor de context en dynamiek van de school en heeft nauw contact met de Gezonde School coördinator. Hij/zij verkrijgt hierdoor inzicht in de wensen, behoeftes, verwachtingen en mogelijkheden van de school en speelt hier flexibel op in.

### **4. De kritische vriend (Engels: critical friend)**

De GSA is een sparringpartner voor de school. Hij/zij begeleidt de school in het proces van de Gezonde School aanpak. De GSA denkt mee, adviseert en motiveert, maar blijft ook kritisch gedurende dit proces.

### **5. De ambassadeur van de Gezonde School Aanpak (Engels: ambassador of the Healthy School Approach)**

De GSA enthousiasmeert de school en externe partners over de Gezonde School aanpak. Hij/zij helpt de school en externe partners om het belang en de noodzaak in te zien om met deze integrale aanpak te werken.

*Algemeen:*

- Herken je je in deze rollen?
- Mist er volgens jou nog een belangrijke rol?

*Als we inzoomen op iedere aparte rol: [per rol deze vragen bespreken]*

- Wat zijn de belangrijkste taken volgens jou in deze rol?
- Wat moet je volgens jou in deze rol goed kunnen als GSA zijnde?
- Heb je bepaalde handige trucs of tactieken die je altijd wel gebruikt in deze rol?

- In hoeverre stem je je werkzaamheden in deze rol af op de specifieke kenmerken en omstandigheden van de school? Hoe doe je dat dan? Kun je voorbeelden geven?

### **Deel 3: Wensen en behoefte rondom een training**

We hebben het veel gehad over allerlei verschillende fases en rollen en het contextgericht werken hierin.

- Als je nu zou moeten aangeven op een schaal van 1 tot 10 in hoeverre jij in het algemeen contextgericht werkt als GSA, wat voor score zou dit dan zijn?
- Wat zou je nodig hebben voor een hoger cijfer?
- Zouden we daar in de module die we gaan ontwikkelen nog iets in kunnen betekenen?
- Hoe zou zo'n module er dan idealiter uitzien volgens jou? Bijv. hoe lang? Fysiek of online? Bepaalde werkvormen? Bepaalde inhoud?

### **Einde interview**

Bedankt voor je deelname en het inkijkje in jouw werk.
