# Supplementary material for: De ontwikkeling van een training om Gezonde School-adviseurs te stimuleren contextgericht te werken: een proces in cocreatie
Source: Springer Nature journal article supplement (doi:10.1007/s12508-023-00405-x), 2023-06-30
Supplement: MOESM4 [file 25563748]

# Factsheet | De rollen van een Gezonde School-adviseur

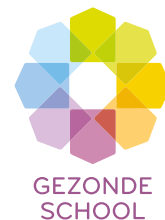

## De verschillende rollen van een Gezonde School-adviseur

Gezonde School helpt scholen om te werken aan een gezonde leefstijl. Hoe een school dit doet, kan erg verschillen. Elke school heeft namelijk unieke behoeften, wensen en mogelijkheden, die ook nog eens continu kunnen veranderen. Een school is dan ook een zeer dynamische organisatie. Een gezonde leefstijl integreren kan daardoor een behoorlijke uitdaging zijn voor scholen. Gelukkig hoeven ze dit niet alleen te doen. Ze kunnen advies en ondersteuning krijgen van een Gezonde School-adviseur (GSA) van de GGD. Een GSA staat een school bij in het proces om een Gezonde School te worden én te blijven. De GSA zal hierbij, samen met de school, kijken naar de specifieke situatie van de school en de ondersteuning hierop zo veel mogelijk proberen aan te passen. Dit vergt een flinke mate van flexibiliteit en creativiteit van de GSA.

Maar hoe ziet die ondersteuning van een GSA er in het algemeen uit? Welke rollen kan een GSA aannemen om een school goed te kunnen begeleiden bij het implementeren van de Gezonde School-aanpak? Op basis van literatuuronderzoek, en interviews en co-creatie sessies met ervaren GSA's, zijn er vijf rollen gedefinieerd: de navigator, de spin in het web, de lokale expert, de kritische vriend, en de ambassadeur. Het hangt vervolgens van de GSA zelf af en van de specifieke situatie in de school, welke rol(len) in meer of mindere mate worden aangenomen door de GSA. In deze factsheet worden de vijf rollen toegelicht en geïllustreerd met citaten en tips van GSA's uit de praktijk. Ook worden voorbeelden van vaardigheden genoemd die belangrijk zijn binnen iedere specifieke rol.

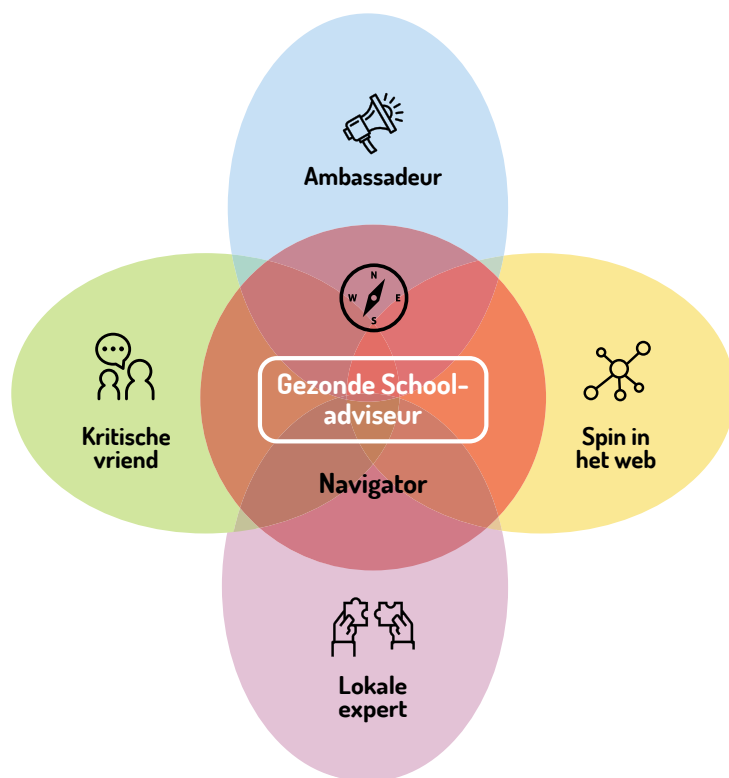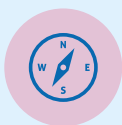

## De navigator

### Rolbeschrijving

Door middel van nauw contact met de Gezonde School-coördinator en/of -werkgroep helpt de GSA de school om keuzes te maken op basis van hun unieke context en dynamiek. De GSA kijkt en luistert naar de behoeftes, wensen en mogelijkheden die er zijn in en rondom de school. Zo krijgt de GSA inzicht in de situatie en de kansen van de school, en in de aanwezige motivatie, kennis en vaardigheden van de mensen in de school.

### Voorbeelden van belangrijke vaardigheden

- Goed luisteren en doorvragen
- Empathisch zijn en een open houding aannemen
- Vertrouwensband opbouwen
- Advies op maat geven
- Flexibel opstellen
- Omgevingsgevoelig zijn en goed inschattingsvermogen hebben
- Oplossingsgerichte houding aannemen
- Helicopterview hebben

*'Ik zie het als mijn taak om met de school mee te denken hoe acties en activiteiten passen in hun situatie en hoe ze een thema op langere termijn kunnen borgen. Dit vergt het herkennen van kansen en het maken van veel keuzes, waar ik scholen graag bij help.'*

### Tip van een GSA

Ik probeer altijd te investeren in het opbouwen van een vertrouwensband, zeker met de Gezonde School-coördinator, omdat ik heb ervaren dat wederzijds vertrouwen helpt om een goed inzicht te krijgen in de wensen en behoefte van de school. Ik merk dat het daarbij helpt om ook expliciet uit te spreken wat je voor elkaar kunt betekenen en wat je van elkaar mag verwachten.

### Tip van een GSA

Wij houden een logboek bij van elke school waar we contact mee hebben. Zo kan ik heel makkelijk terug halen wat de situatie in en rondom de school was. Dit is niet alleen makkelijk als voorbereiding op een gesprek, maar ook als een (nieuwe) collega de begeleiding van een school overneemt.

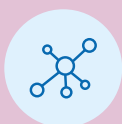

## De spin in het web

### Rolbeschrijving

De GSA verbindt de school met externe partners, zoals de gemeente of welzijnsorganisaties. De GSA helpt om alle externe partijen in co-creatie met de school te laten samenwerken, waarin een balans wordt gevonden tussen expertise en kansen van buiten de school en de behoeften, wensen en mogelijkheden van de mensen in de school.

### Voorbeelden van belangrijke vaardigheden

- Netwerken
- Omgevingsgevoelig zijn
- Communicatief vaardig zijn
- Relaties managen
- Zelfstandig werken
- Nieuwsgierig opstellen

### Tip van een GSA

Neem de tijd om stil te staan bij wie er allemaal in je netwerk zitten. Ik zou een (startend) GSA adviseren om bijvoorbeeld bij collega's te vragen welke partijen zij vaak tegen komen. Neem vervolgens de tijd om connecties op te bouwen: dit gebeurt vaak niet van de ene op de andere dag.

### Tip van een GSA

Als GSA ben je relatiebeheerder tussen de school en andere partijen als het gaat om gezondheidsbevordering. Ik maak daarom duidelijke afspraken met betrokken partijen, bijvoorbeeld met de gemeente, over het contact met de school rondom gezonde leefstijl.

*'Ik maak verbindingen tussen de school en andere partijen. Bijvoorbeeld als een school iets met bewegen wil doen, haal ik de buurtsportcoach erbij.'*

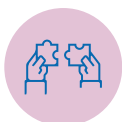

## De lokale expert

### Rolbeschrijving

De GSA beschikt over expertise en up-to-date kennis wat betreft de integrale en structurele Gezonde School-aanpak en de lokale en regionale kansen en mogelijkheden. Ook is de GSA in staat om op basis van de behoefte van de school verdiepende expertise over specifieke gezondheidsthema's te vergaren bij collega's en/of thema-instituten. De GSA zet deze kennis in, samen met de eigen ervaringen en expertise, om de school te ondersteunen een Gezonde School te worden én te blijven.

### Voorbeelden van belangrijke vaardigheden

- Advies op maat geven
- Op de hoogte blijven van lokale, regionale en nationale ontwikkelingen rondom gezondheidsthema's, interventies, Gezonde School-aanpak en subsidiemogelijkheden
- Inschattingsvermogen hebben
- Omgevingsgevoelig zijn
- Samenwerken binnen de eigen GGD

### Tip van een GSA

In het team van GSA's hebben we thema's verdeeld. Ik ben verantwoordelijk om up-to-date te blijven over het thema voeding, en een andere collega over het thema welbevinden. Zodra het nodig is, zoeken we elkaar op.

### Tip van een GSA

Steeds meer scholen in mijn gebied zijn bezig met Gezonde School, dus ik gebruik tijdens mijn ondersteuning ook vaak de ervaring die ik heb opgedaan bij andere scholen. Dit hanteer ik dan als voorbeeld hoe zij bepaalde aspecten binnen een thema hebben aangepakt.

*'Ik probeer goed op de hoogte te blijven van alle informatie die er landelijk is. Daarin let ik vooral op de updates rondom de vier pijlers en hoe ik scholen daarbij kan ondersteunen in hun integrale aanpak. We hebben hiervoor ook binnen onze GGD bepaalde leidraden en richtlijnen, maar ik vind het ook prettig dat ik eigen vrijheid krijg zodat ik deze informatie ook kan vertalen naar de lokale situatie van de school.'*

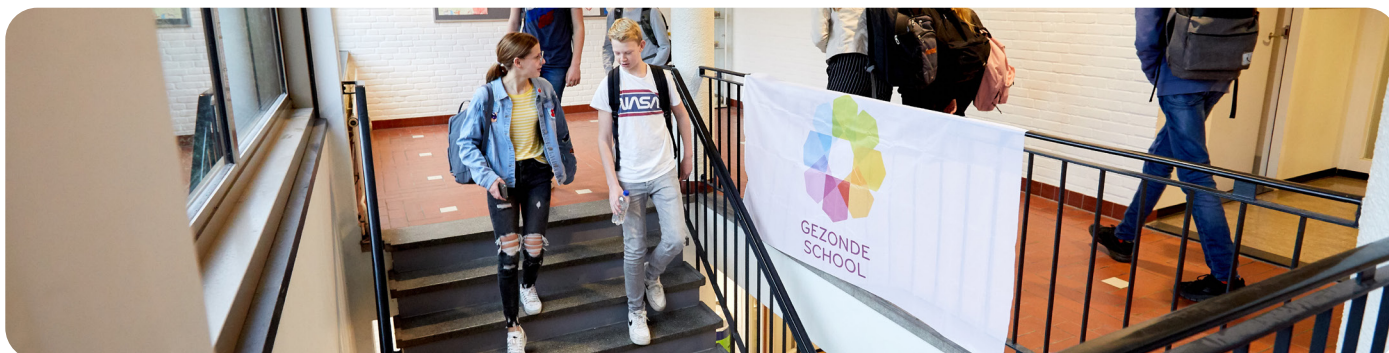

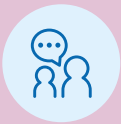

## De kritische vriend

### Rolbeschrijving

De GSA is een sparringpartner voor de Gezonde School-coördinator en begeleidt de school in het proces van Gezonde School. De GSA denkt mee, adviseert en motiveert. Hierin is de GSA ook een kwaliteitsbewaker van het proces: hij/zij volgt dit proces met een kritische blik en stuurt bij waar nodig.

### Voorbeelden van belangrijke vaardigheden

- Empathisch opstellen
- Vertrouwensband opbouwen
- Enthousiasme en vertrouwen geven
- Doorvragen en oplossingsgerichte houding aannemen
- Helicopterview hebben

*'Ik probeer altijd afspraken te maken wat we voor elkaar kunnen betekenen op zowel de korte als de lange termijn. Ik help een school graag bij een urgente vraag, maar ik ben er ook voor om te zorgen dat we toe gaan werken naar structurele borging.'*

### Tip van een GSA

Ik gebruik vaak de thema-vragenlijst die gericht is op de vier pijlers (educatie, omgeving, signaleren, beleid) om samen met de Gezonde School-coördinator na te gaan of we op de goede weg zitten. Dan bespreken we ook of het voor de school haalbaar en wenselijk is om op korte termijn naar een vignet toe te werken, want ook dat is afhankelijk van de situatie.

### Tip van een GSA

Ik begeleid soms scholen die al duidelijk voor ogen hebben welke concrete activiteit ze dat schooljaar uit willen voeren, maar geen overkoepelend plan hebben. Dan probeer ik mijn ondersteuning juist op het proces in te steken: waar staan ze nu en waar willen ze naar toe? Ik geef gedurende deze ondersteuning tips en adviezen over hoe ze bijvoorbeeld een sterke Gezonde School-werkgroep op kunnen zetten.

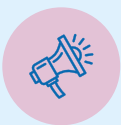

## De ambassadeur

### Rolbeschrijving

De GSA enthousiasmeert de mensen in de school en externe partijen over Gezonde School. Hij/zij benadrukt het belang en de noodzaak om gezamenlijk met de integrale Gezonde School-aanpak te werken. Dit doet de GSA zowel in het begin van het proces om partijen te enthousiasmeren om met Gezonde School te starten, maar ook gedurende het proces om borging te stimuleren.

### Voorbeelden van belangrijke vaardigheden

- Enthousiasmeren, motiveren en overtuigen
- Communicatief vaardig
- Doorzettingsvermogen hebben
- Proactief contact onderhouden
- Relaties managen
- Anticiperen op nieuwe ontwikkelingen

*'Ik benader scholen actief om ze te enthousiasmeren voor Gezonde School, ook de scholen waar ik nauwelijks contact mee heb. Ik probeer altijd te zoeken naar de juiste ingang en kies de momenten waarvan ik denk dat de school er het meest voor open staat.'*

### Tip van een GSA

Zorg voor promotie en positieve aandacht! Als een school een vignet heeft behaald, regel ik bijvoorbeeld dat de lokale ambtenaar een bos bloemen komt brengen bij de school. Zo komt de knappe prestatie van de school in het lokale nieuws en creëren we meer bekendheid voor Gezonde School.

### Tip van een GSA

Ik probeer scholen over te halen met Gezonde School te blijven werken door ze bijvoorbeeld te attenderen op nieuwe subsidierondes. Ook kijk ik of er (lokale) ontwikkelingen gaande zijn die relateren aan een gezonde leefstijl, zoals een Preventieakkoord. Hierdoor kan ik Gezonde School nog een keer onder de aandacht brengen bij scholen én externe partijen. Het gaat er eigenlijk altijd om dat je op zoek gaat naar de juiste haakjes/bepaalde aspecten binnen een thema hebben aangepakt.

## Colofon

Deze factsheet is tot stand gekomen binnen het ZonMw-onderzoekproject 'Deskundigheidsbevordering van Gezonde School-adviseurs: naar context-gestuurde adaptie van het implementatieproces' (nr.50-55505-98-105). Dit project is opgezet in samenwerking met Gezonde School en wordt uitgevoerd door Maastricht University en de Vrije Universiteit Amsterdam. Dank aan de Gezonde School-adviseurs die hebben bijgedragen aan de ontwikkeling van deze factsheet. Zie voor meer informatie over Gezonde School: [www.gezondeschool.nl](http://www.gezondeschool.nl).
