# Supplementary material for: De ontwikkeling van een training om Gezonde School-adviseurs te stimuleren contextgericht te werken: een proces in cocreatie
Source: Springer Nature journal article supplement (doi:10.1007/s12508-023-00405-x), 2023-06-30
Supplement: MOESM5 [file 25563748]

## Door de GSA ervaren lastige situaties

Deze lijst is gebaseerd op lastige situaties die in de panelsessies met de Gezonde School-adviseurs (GSA's) zijn geïdentificeerd.

- **Vignet als doel:** De school ziet het behalen van een Gezonde School-vignet als een doel op zich (in plaats van het benaderen als een proces).
- **Kansen verdampen:** Regelmatig verdampen de kansen en mogelijkheden die je als GSA samen met de school hebt geïdentificeerd.
- **Losse activiteiten:** School begint vaak aan losse activiteiten die niet worden opgevolgd of afgemaakt.
- **Draagvlak binnen het team:** Er is weinig draagvlak binnen het team voor de Gezonde School (of een thema).
- **Ouderbetrokkenheid:** Er is beperkte ouderbetrokkenheid voor de Gezonde School (of een thema).
- **Leerling participatie:** Er is beperkte leerling participatie voor de Gezonde School (of een thema).
- **De gemeente:** Er is een spanningsveld tussen de gemeente en de school in de communicatie/verwachtingen rondom de Gezonde School.
- **Lokaal netwerk:** Je hebt als GSA weinig overzicht over het lokale netwerk van de school om te weten wie waarmee kan ondersteunen.
- **Uitvoer na ondersteuningsaanbod:** Er is een verschil in verwachtingen tussen de GSA en de school wie de uitvoer kan/gaat doen na het behalen van ondersteuningsaanbod.
- **Toewerken naar een structurele aanpak:** Er is een spanningsveld of je als GSA in gaat spelen op een incidentele vraag vs. het toewerken naar een structurele aanpak.
- **Besteding van ondersteuningsaanbod:** Er is een verschil in verwachtingen tussen de GSA en de school waar het ondersteuningsaanbod voor bedoeld is.
- **Wisseling van Gezonde School-coördinator:** Een wisseling van de Gezonde School-coördinator in de school heeft impact op het contact en de vertrouwensband met de school.
- **Continuïteit van thema's:** De focus van een school op een bepaald thema verwatert als het vignet behaald is.
- **Subsidies:** Subsidies geven geen structurele basis voor acties en activiteiten voor de school.
- **Interne samenwerkingen:** Er is een suboptimale interne samenwerking binnen de GGD met Jeugdgezondheidszorg voor de beste ondersteuning aan de school.
- **Draagvlak directeur:** De directeur vindt het belangrijk, maar het implementeren van de Gezonde School-aanpak wordt vervolgens bij de docent 'gedropt'.
- **Weerstand van ouders:** De Gezonde School-aanpak grenst aan een stukje opvoeding wat weerstand kan oproepen (vaak wordt dit ervaren bij de thema's Voeding en Relaties en seksualiteit).
