# Supplementary material for: De ontwikkeling van een training om Gezonde School-adviseurs te stimuleren contextgericht te werken: een proces in cocreatie
Source: Springer Nature journal article supplement (doi:10.1007/s12508-023-00405-x), 2023-06-30
Supplement: MOESM6 [file 25563748]

## Inspiratielijst van contextuele factoren in en rondom school

Dit document omschrijft verschillende contextuele factoren in en rondom school die van invloed kunnen zijn op de ondersteuning die een Gezonde School-adviseur (GSA) aan een school biedt. Alle factoren zijn opgeschreven als vragen die de GSA kunnen helpen om de schoolcontext steeds opnieuw te duiden tijdens het ondersteuningsproces. Dit document kan daarom dienen als een hulpmiddel voor GSA's om contextgericht te werken, met een centrale vraag die GSA's zichzelf kunnen stellen: **Weet ik voldoende af van deze contextuele factor, zodat ik er, waar nodig, naar kan handelen?** Dit document is opgesteld als een inspiratielijst en kan altijd aangevuld worden met andere factoren die van belang zijn in het ondersteuningsproces van een GSA.

De contextuele factoren zijn opgedeeld in verschillende categorieën op basis van de contactfase waar een GSA zich in kan bevinden.

**Feitelijke contextfactoren:** Dit zijn factoren die je als GSA ongeacht de contactfase kunt onderzoeken. Deze factoren zijn opgedeeld tussen factoren die te maken hebben met omstandigheden in en rondom de school:

| Contextuele factoren                       | Bijbehorende vragen                                                                                                                                                                                                       |
|--------------------------------------------|---------------------------------------------------------------------------------------------------------------------------------------------------------------------------------------------------------------------------|
| <b>In de school</b>                        |                                                                                                                                                                                                                           |
| Type school:                               | Welk type school is het? po, vo, mbo, speciaal onderwijs                                                                                                                                                                  |
| Schoolpopulatie:                           | Hoe is de populatie van de school? Leerlingen, ouders, team                                                                                                                                                               |
| Ligging school:                            | Hoe is de ligging van de school? Fysieke omgeving, type wijk etc.                                                                                                                                                         |
| Afstand GGD – school:                      | Wat is de fysieke afstand tussen de GSA en de school? Hoe ver ligt de school bij jouw standplaats vandaan?                                                                                                                |
| Bestaand contact:                          | Is er al een bestaand contact of vertrouwensband met de GSC/school?                                                                                                                                                       |
| Ingang in school:                          | Wat is jouw ingang in de school? Hoe ben je de school binnen gekomen? Bijvoorbeeld via toegekende subsidie, via gezondheidsmonitor, via proactief contact, via vraag van de school.                                       |
| Gezonde School-coördinator (GSC):          | Welke positie neemt de contactpersoon of GSC op de school in? Bijvoorbeeld directeur, leraar, intern begeleider etc.                                                                                                      |
| Ondersteuningsaanbod:                      | Heeft de school momenteel ondersteuningsaanbod? Zo ja, voor welk thema?                                                                                                                                                   |
| Vignet:                                    | Heeft de school al een vignet behaald? Zo ja, voor welk thema?                                                                                                                                                            |
| .....                                      |                                                                                                                                                                                                                           |
| <b>Rondom de school</b>                    |                                                                                                                                                                                                                           |
| Zicht op het netwerk:                      | In hoeverre heb je zicht op het (lokale en regionale) netwerk in de gemeente m.b.t. partijen die de school kunnen ondersteunen in het proces van de Gezonde School-aanpak?                                                |
| Gemeentelijk beleid:                       | Welk beleid voert de gemeente omtrent gezonde leefstijl op scholen?                                                                                                                                                       |
| Contacten tussen de gemeente en de school: | Welke contactgeschiedenis is er tussen de school en de gemeente? Wat waren de ervaringen van zowel de school als de gemeente hierin?                                                                                      |
| Optimale samenwerkingen:                   | Is het mogelijk om samenwerkingen op te zetten met externe partners? Denk aan JGZ-collega's, JOGG-regisseur, jongerenwerk, buurtsportcoach etc.) Hoe kun je deze samenwerkingen zo optimaal mogelijk inrichten/gebruiken? |
| .....                                      |                                                                                                                                                                                                                           |

**Contextuele factoren in de kennismakingsfase:** Dit zijn factoren die je als GSA verkent in de eerste contactmomenten die je met een school hebt. Samen met een school kunnen deze factoren verkend worden om een beeld te krijgen over de school. Gaandeweg kunnen deze factoren natuurlijk veranderen.

| <b>Contextuele factoren</b>                             | <b>Bijbehorende vragen</b>                                                                                                                                                                                                                                                                                            |
|---------------------------------------------------------|-----------------------------------------------------------------------------------------------------------------------------------------------------------------------------------------------------------------------------------------------------------------------------------------------------------------------|
| <i>Doel van de school:</i>                              | In hoeverre wil de school gaan voor een structurele, planmatige Gezonde School-aanpak? Let er bijvoorbeeld op of het behalen van het vignet een doel op zich is en of de school alleen met urgente vragen komt in plaats van ondersteuning wil voor een structurele inbedding van de Gezonde School-aanpak.           |
| <i>Stand van zaken Gezonde School:</i>                  | Wat doet de school al op de vier pijlers van de Gezonde School (educatie, schoolomgeving, signaleren, beleid)?                                                                                                                                                                                                        |
| <i>Thema's:</i>                                         | Heeft de school al een specifiek thema gekozen en hoe is dit tot stand gekomen?                                                                                                                                                                                                                                       |
| <i>Veranderingen in de school:</i>                      | Zijn er bepaalde veranderingen gaande in de school die van invloed kunnen zijn op de Gezonde School zoals een fusie, verbouwing of reorganisatie?                                                                                                                                                                     |
| <i>Kennis/vaardigheden/competenties van school/GSC:</i> | In hoeverre heeft de GSC en de Gezonde School-werkgroep de kennis, vaardigheden en competenties om toe te werken naar een structurele, planmatige Gezonde School-aanpak waar draagvlak voor is?                                                                                                                       |
| <i>Draagvlak team:</i>                                  | In hoeverre is er draagvlak in het team om aan de Gezonde School-aanpak en het gekozen thema te werken? In welke mate is het team bereid te handelen en actief mee te helpen aan het opbouwen van een Gezonde School?                                                                                                 |
| <i>Draagvlak leerlingen:</i>                            | In hoeverre is er draagvlak onder leerlingen om aan het Gezonde School-thema te werken? In hoeverre hebben leerlingen inspraak op school? In hoeverre ziet de school meerwaarde in actieve leerlingenparticipatie en hebben ze hier mogelijkheden toe?                                                                |
| <i>Draagvlak ouders:</i>                                | In hoeverre is er draagvlak onder ouders om aan het Gezonde School-thema te werken? In hoeverre hebben ouders inspraak op school? In hoeverre ziet de school meerwaarde in actieve ouderbetrokkenheid en hebben ze hier mogelijkheden toe?                                                                            |
| <i>Afstemming rondom ondersteunings-aanbod:</i>         | In hoeverre is er overeenstemming tussen betrokken partijen waar het ondersteuningsaanbod het beste voor gebruikt kan worden? Bijvoorbeeld voor de aanstelling van de GSC of (structurele) activiteiten. Is het ondersteuningsaanbod aangevraagd op advies van een externe partij om zo hun activiteit te bekostigen? |
| <i>Afstemming coördinatie:</i>                          | Is er overeenstemming tussen betrokken partijen wie de coördinatie en uitvoering van Gezonde School-activiteiten doet? Is het daarbij duidelijk dat de GSA een ondersteunende rol heeft in plaats van uitvoerend?                                                                                                     |
| .....                                                   |                                                                                                                                                                                                                                                                                                                       |

**Contextuele factoren in de uitvoerende fase:** Dit zijn factoren die je verkent met de school zodra ze in een uitvoerende fase terecht komen. Natuurlijk kunnen feitelijke factoren en factoren uit de kennismakingsfase veranderen, dus het is van belang deze in de gaten te houden.

| <b>Contextuele factoren</b>                          | <b>Bijbehorende vragen</b>                                                                                                                                                        |
|------------------------------------------------------|-----------------------------------------------------------------------------------------------------------------------------------------------------------------------------------|
| <i>Geïdentificeerde kansen omzetten naar acties:</i> | In hoeverre is de school/GSC in staat om kansen en mogelijkheden die je samen identificeert hebt te grijpen/om te zetten naar concrete actie, passend bij een structurele aanpak? |
| <i>Opvolging geven aan acties:</i>                   | In hoeverre is de school/GSC in staat om een actie die is ingezet volledig af te ronden/opvolging aan te geven, passend bij een structurele aanpak?                               |
| <i>Uitvoerend draagvlak:</i>                         | In hoeverre is er draagvlak in het team om opgezette plannen daadwerkelijk uit te voeren?                                                                                         |
| <i>Omgaan met weerstand:</i>                         | In hoeverre is de school in staat om te gaan met onverwachte weerstand (van bijvoorbeeld ouders) nadat ze voor een bepaald thema hebben gekozen?                                  |
| <i>Wisseling van rollen:</i>                         | In hoeverre is de school in staat om te gaan met onverwachte wisselingen van bepaalde rollen, zoals de GSC of de directie, wat van invloed kan zijn op eerder gemaakte plannen?   |
| .....                                                |                                                                                                                                                                                   |

**Contextuele factoren in de continuerende fase:** Dit zijn factoren die je verkent met de school zodra de school een tijd bezig is met de Gezonde School-aanpak, bijvoorbeeld als ze een vignet behaald hebben of als ze zich willen gaan focussen op een ander thema. Ook hier gaat het om factoren die aanvullend zijn op factoren aan eerdere fases. Uiteraard zullen sommige factoren mogelijk wat meer naar de achtergrond verdwijnen omdat dit duidelijk goed geregeld is in een school, maar ook hier kunnen door de tijd heen veranderingen in optreden.

| <b>Contextuele factoren</b>                 | <b>Bijbehorende vragen</b>                                                                                                                                                                     |
|---------------------------------------------|------------------------------------------------------------------------------------------------------------------------------------------------------------------------------------------------|
| <i>Structurele plannen en beleid</i>        | In hoeverre is de school in staat beleid op te stellen en activiteiten een structurele plek te geven (in beleid of het curriculum) zodat deze activiteiten gecontinueerd kunnen worden?        |
| <i>Beschikbare middelen:</i>                | In hoeverre is het voor de school mogelijk middelen vrij te spelen om de Gezonde School te continueren als de 'basis-middelen en -subsidies' van de aanpak zijn opgebruikt?                    |
| <i>Continuering van thema-activiteiten:</i> | In hoeverre is de school in staat activiteiten te continueren na het behalen van een thema-certificaat? Ziet de school dit nog als prioriteit? Zijn er nog voldoende middelen beschikbaar?     |
| <i>Wisseling van rollen:</i>                | In hoeverre is de school in staat activiteiten voor een bepaald thema te continueren als de GSC-rol verandert? Hoe beïnvloedt een wisseling de bestaande ondersteuningsafspraken in deze fase? |
| .....                                       |                                                                                                                                                                                                |
