# Supplementary material for: De ontwikkeling van een training om Gezonde School-adviseurs te stimuleren contextgericht te werken: een proces in cocreatie
Source: Springer Nature journal article supplement (doi:10.1007/s12508-023-00405-x), 2023-06-30
Supplement: MOESM7 [file 25563748]

## De ontwikkelde training

### Doel

GSA's bewust maken van het werken met een contextgerichte aanpak én het aanmoedigen van GSA's te werken met zo'n contextgerichte aanpak, waarbij aandacht is voor de meerwaarde van het inspelen op de unieke en dynamische context van iedere school.

### Specifieke leerdoelen

Met het volgen van de training, willen we stimuleren dat een GSA:

- kennis heeft gemaakt met het gedachtegoed rondom contextgericht werken en de meerwaarde van deze manier van werken in gaat zien.
- inspiratie heeft welke factoren van invloed kunnen zijn op de specifieke context van de school en hier gedurende de ondersteuning bewust van blijft.
- de vijf rollen van de GSA kent en herkent in zijn/haar eigen ondersteuning naar scholen.
- inzicht heeft in hoe de rollen kunnen bijdragen aan het contextgericht werken.
- inzicht heeft in hoe te navigeren in de unieke en dynamische context van een school.

### Opbouw van de training

1. *Welkom, kennismaking & doel van de training*: deelnemers worden verwelkomd en verwachtingen worden besproken om een open, veilige en vertrouwde sfeer te creëren.
2. *Introductie contextgericht werken*: deelnemers worden meegenomen in het gedachtegoed van contextgericht werken en de school als complex systeem, toegepast op de dagelijkse praktijken van scholen. Dit wordt gedaan aan de hand van een stelling en een animatiefilmpje. Er wordt geoefend met inzicht krijgen in de context.
3. *De rollen van de GSA & oefening 'Rollen herkennen'*: de rollen van de GSA worden besproken. Deelnemers gaan aan de slag om deze rollen te herkennen in praktijksituaties. Dit doen ze eerst als groep aan de hand van een klassikale casus. Vervolgens gaan ze in kleine groepjes aan de slag met hun eigen casus aan de hand van de voorbereidende opdracht.
4. *Oefening 'Dynamische schoolcontexten – draagvlak'*: deelnemers gaan aan de slag met een casus over draagvlak, omdat dit een belangrijke succesfactor is voor de Gezonde School maar lastig te realiseren is in de praktijk. Door middel van het introduceren van dynamische veranderingen op basis van de geïdentificeerde lastige situaties, gaan ze oefenen met de realiteit van de praktijk die constant in beweging is. Elke keer als er iets verandert in de situatie van de casus, worden GSA's uitgedaagd hierop te reageren en te reflecteren welke rollen ze in kunnen nemen.
5. *Oefening 'Dynamische schoolcontexten – borging'*: door middel van een groepsdiscussie gaan deelnemers met elkaar in gesprek wat continuering en borging precies kan betekenen en welke rollen zij daarin kunnen innemen.
6. *Afsluiting*: de dag wordt afgesloten door terug te blikken op verwachtingen, tips & tops uit te wisselen en te evalueren.

### Een toekomstbestendig eindproduct

Er zijn verschillende aspecten binnen de training toegevoegd om een toekomstbestendig eindproduct neer te zetten dat kan meebewegen met veranderingen in de (landelijke) context. Zo is er in de training veel gebruik gemaakt van casuïstiek, waardoor er snel ingespeeld kan worden op veranderingen. Daarnaast is er voor toekomstige trainers een trainershandleiding ontwikkeld met alle nodige informatie en achtergrond. Tenslotte is er een implementatieplan opgesteld met de betrokken partners (Programmteam Gezonde School, Universiteit Maastricht en VU Amsterdam) om de kwaliteitsbewaking en -bevordering van de training te borgen. Er is afgesproken om regelmatig samen te reflecteren en evalueren of er updates nodig zijn aan de training, of de training nog goed aansluit bij de wensen en behoeften van de GSA's uit de praktijk, en of het nog goed past binnen het bestaande deskundigheidsbevorderingsaanbod voor GSA's. Alle partners hebben zich gecommitteerd aan dit implementatieplan en zullen dit samen vormgeven.
